# Supplementary material
Source: publisher site journal article supplement (https://db.degruyter.com/publication/dbid/tlm/downloadAsset/TLM_TLM_DFA_General_Information.pdf)
Supplement: Supplementary file 1 [file TLM_TLM_DFA_General_Information.pdf]

## General information on the maps of “Deutscher Familiennamenatlas”

### 1. Data

**data base:** 28,205,713 private landlines (= Telef./ = Tokens) of Deutsche Telekom (as at 30 June 2005); 850 661 different names (+ 244 464 double names with a hyphen) (= Types).

**conversion “Telef.”/name bearer:** 1 landline (= Token) corresponds to 2.9 name bearers

### 2. Maps

**main map:** large map at the beginning of each map complex. It documents the topic of a map complex with the most frequent example or the most common names/ groups of names.

**inset map:** specification (details on particular aspects or data segments) or supplementation of the main map or continuation of the topic with further examples.

**occurrences/zip code:** postcode districts (= “PLZ”). Representation of one-, two-, three- and five-digit zip code possible, usually three digits.

**absolute representation:** Number of name occurrences (“Telef.”= Tokens) per postcode district (= absolute occurrences); absolute representation is used for occurrences below 1,000 “Telef.”

**relative representation:** Share of registered occurrences per mill of the total number of all “Telef.” per postcode district (= relative name density); relative representation is used for occurrences over 1,000 “Telef.”. In most cases, relative representation is used; in some inset maps, absolute representation is used.

**maps with circle symbols:** Presentation of findings by circular symbols in the center of a zip code. The circle symbol maps allow it to compare the proportions of several names using differently colored segments within the circle symbols. Therefore, this representation was chosen as a standard for all maps. Usually, circle symbols are used for three-digit zip codes.

**size of the circle symbols:** The circle size can vary on a scale of 1-60. For the main maps, the minimum size usually is 2 (= 0.5 mm), the maximum size 35 (= 8 mm). The inset maps are smaller compared to the main maps, thus the size of the symbols is larger. The minimum size here is usually 3, the maximum is 50.

**area maps:** Representation by filling the zip code area with different colors and/or color levels. Area maps give a large-scale overview. Usually, circle symbols are used for three-digit zip codes, colored areas for two digit zip codes.

**display threshold for areas:** In the coloring of areas a display threshold is often set. So, for example, “display threshold 0.10 ‰” means that two-digit zipcodes in which these types of names are less than 0.10 ‰ of the total volume of all the names are not colored. Only those zipcodes are colored in which names occur with a share of more than 0,10 ‰.
